# Supplementary material for: Massively synthesizable nickel-doped 1T-MoS2 nanosheet catalyst as an efficient tri-functional catalyst
Source: Royal Society of Chemistry journal article supplement (doi:10.1039/d3ra03016d), 2023-01-01
Supplement: d3ra03016d1.pdf [file d3ra03016d1.pdf]

## Supplementary information

### **Massively synthesizable Nickel-doped 1T-MoS<sub>2</sub> nanosheet catalyst as an efficient tri-functional catalyst**

Yusong Choi,<sup>\*a,b</sup> Tae-Young Ahn,<sup>a</sup> Ji-Youn Kim,<sup>a,c</sup> Eun Hye Lee<sup>a</sup> and Hye-Ryeon Yu,<sup>a,d</sup>

Tel: +82-42-821-2457; Fax: +82-42-823-3400

a. Defense Materials and Energy Development Center, Agency for Defense Development,

Yuseong P.O. Box 35, Daejeon 34060, Korea

b. Department of Defense System Engineering, University of Science and Technology,

Daejeon 34113, Korea

c. Department of Chemical and Biomolecular Engineering, KAIST, 291 Daehak-ro, Yuseong-gu,

Daejeon 34141, Republic of Korea

d. Department of Chemical Engineering and Applied Chemistry, Chungnam National

University, Daejeon 34134, Korea. \*Corresponding Author. E-mail address: yusongchoi

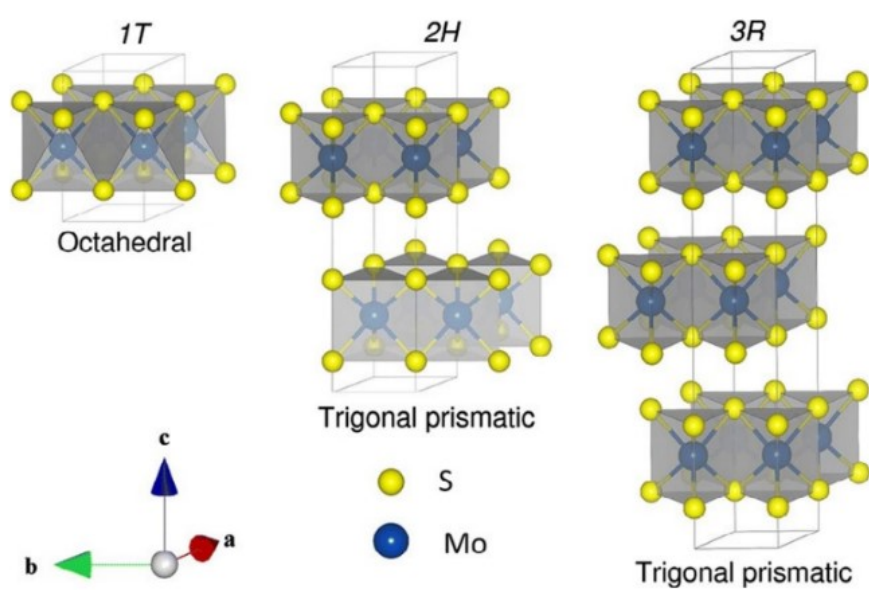

**Figure S1. Crystal structure of MoS<sub>2</sub>: Octahedral (1T), Trigonal prismatic (2H) and Trigonal prismatic (3R) unit cell structures. Reproduced with permission<sup>1</sup>.**

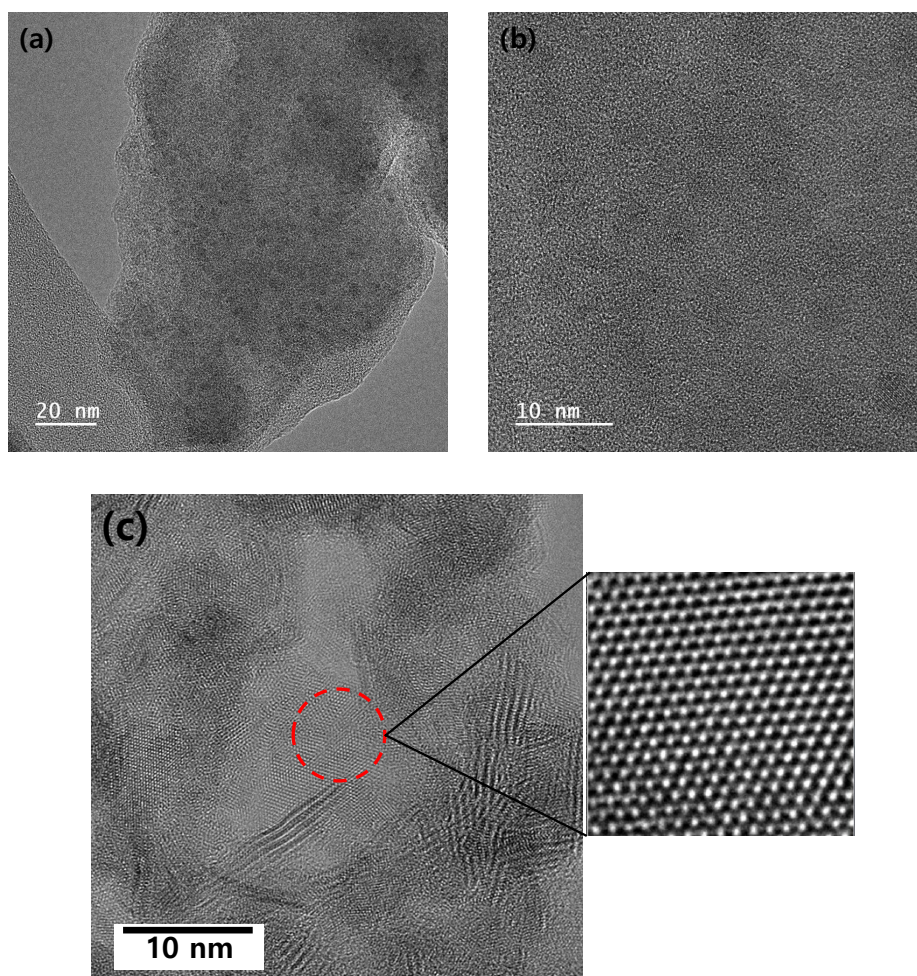

**Figure S2. (a) Transmission electron microscopy (TEM) image of as-synthesized Ni-doped MoS<sub>2</sub> nanoparticle on the amorphous 2D Ni-doped MoS<sub>2</sub> sheet, (b) TEM image of Ni-doped MoS<sub>2</sub> crystalline nanoparticle on the amorphous 2D Ni-doped MoS<sub>2</sub> sheet, (c) TEM image of Ni-doped MoS<sub>2</sub> sheet after heat-treatment.**

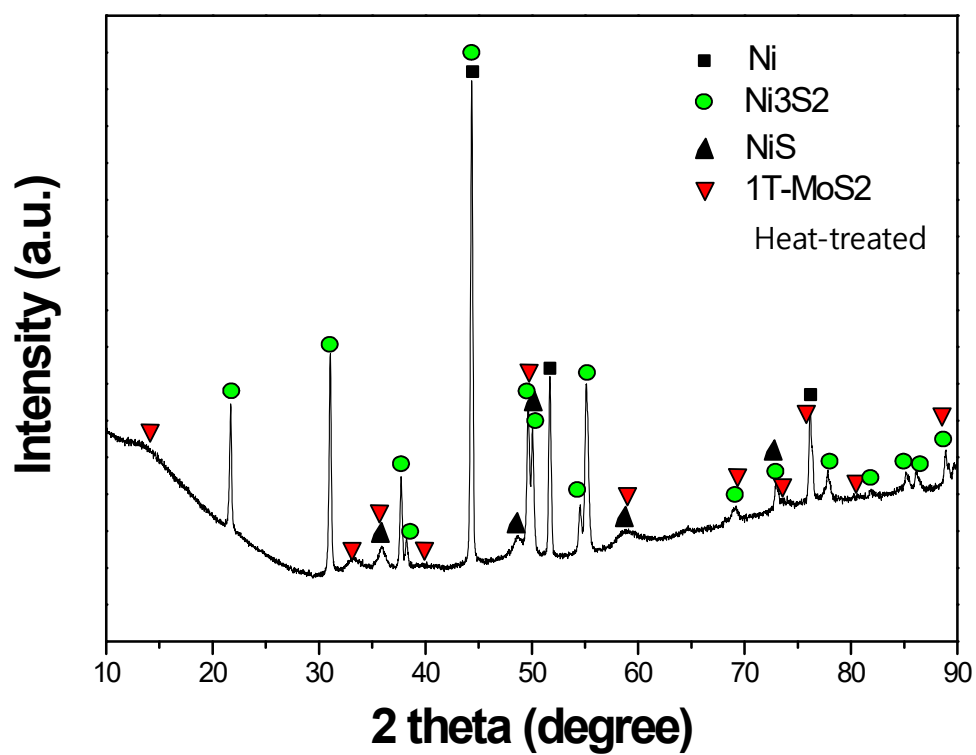

**Figure S3. X-ray diffraction analysis result of the Ni-doped 1T-MoS<sub>2</sub>**

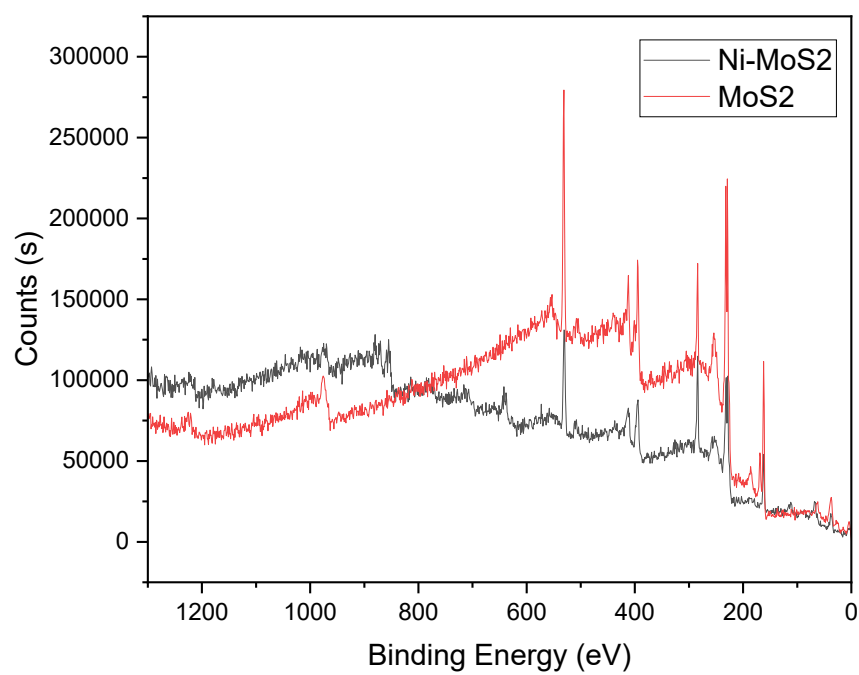

**Figure S4. The XPS full spectrum for Ni-MoS<sub>2</sub> and MoS<sub>2</sub>.**

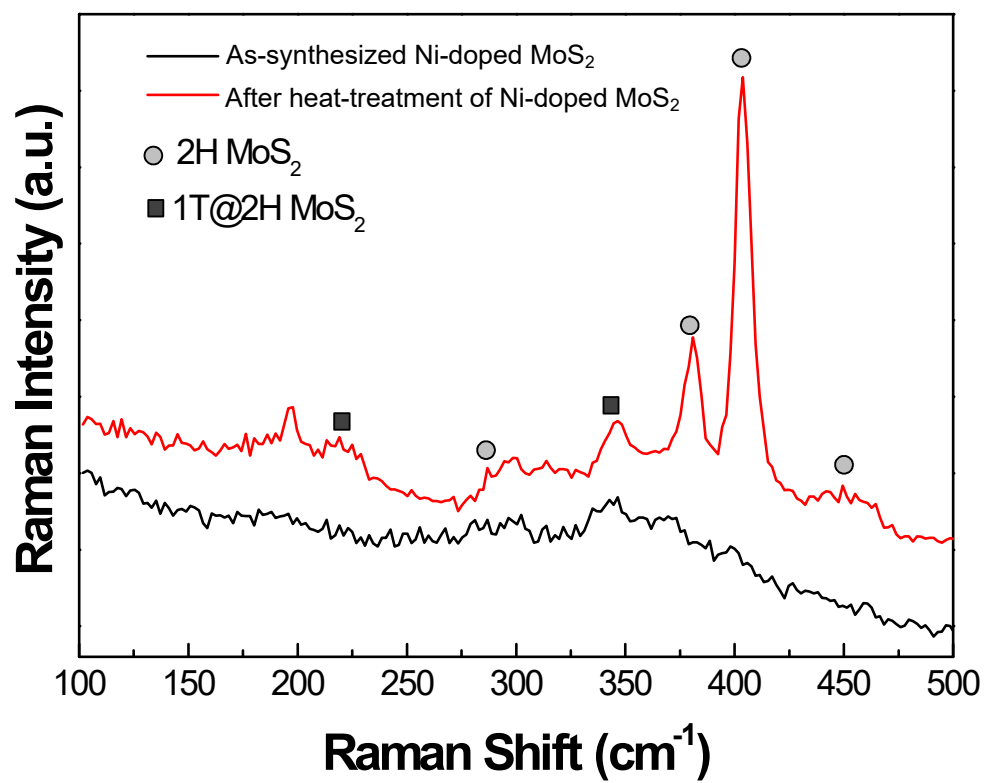

**Figure S5. Raman analysis results of Ni-doped  $\text{MoS}_2$  before and after heat-treatment**

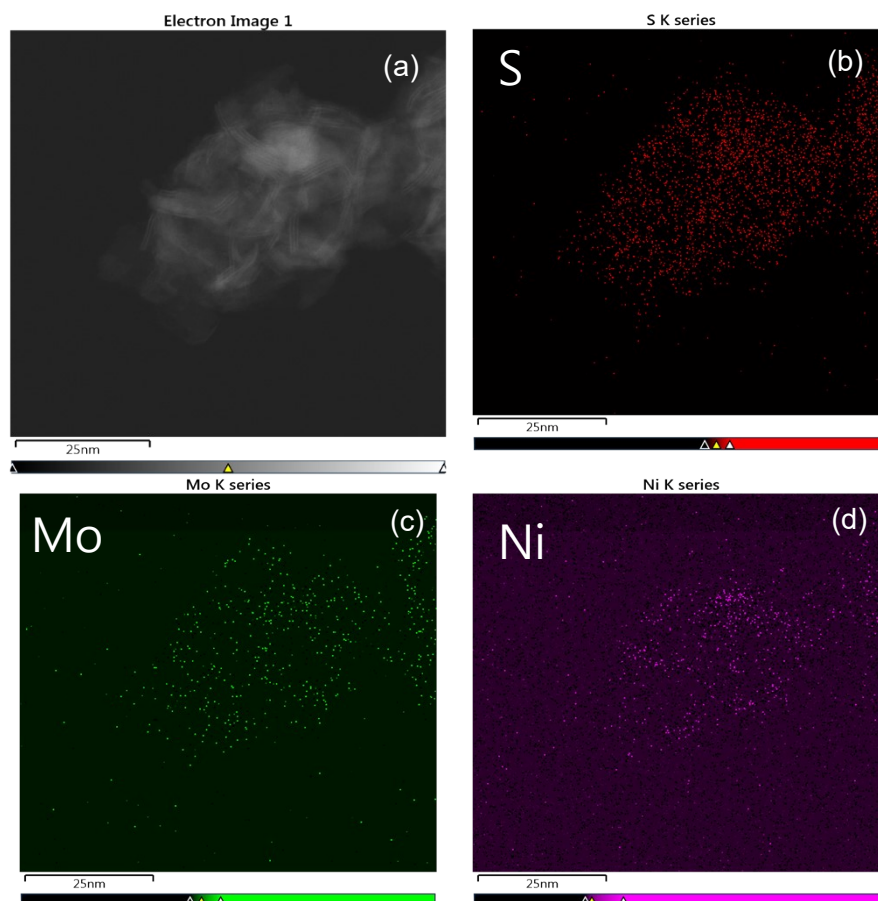

**Figure S6. TEM EDS mapping results of Ni-doped 1T-MoS<sub>2</sub>. (a) TEM image of Ni-doped MoS<sub>2</sub>, (b) TEM EDS mapping result of Sulfur. (c) TEM EDS mapping result of Molybdenum, (d) TEM EDS mapping result of Nickel.**

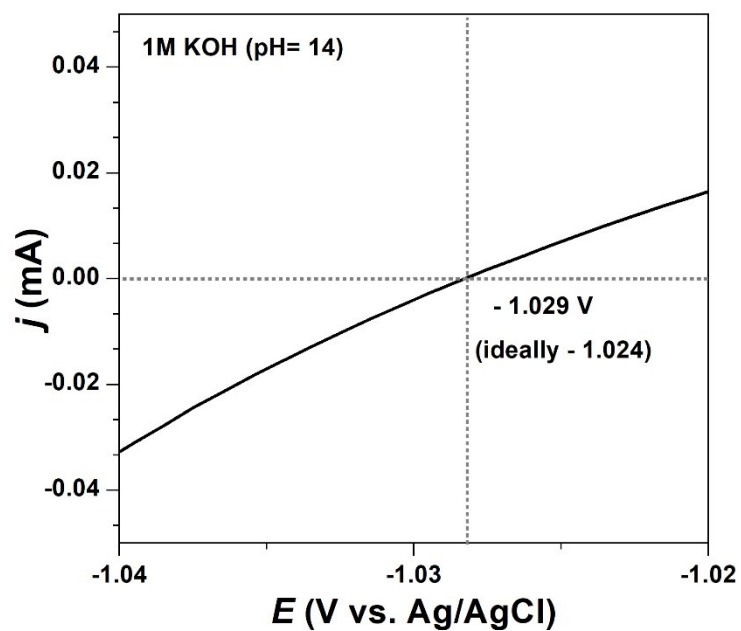

Figure S7. RHE calibration with Pt wires and Ag/AgCl (saturated KCl) reference electrode.



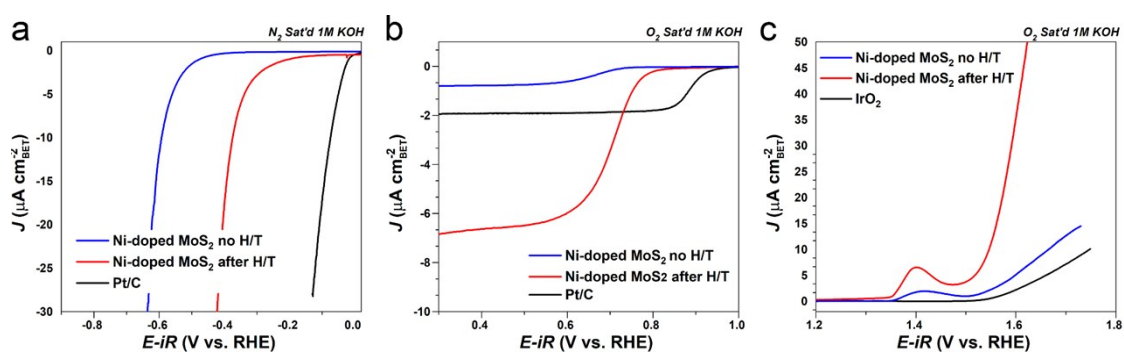

**Figure S8. Specific activity normalized to the surface area as a function of potential for (a) HER, (b) ORR, and (c) OER process.**

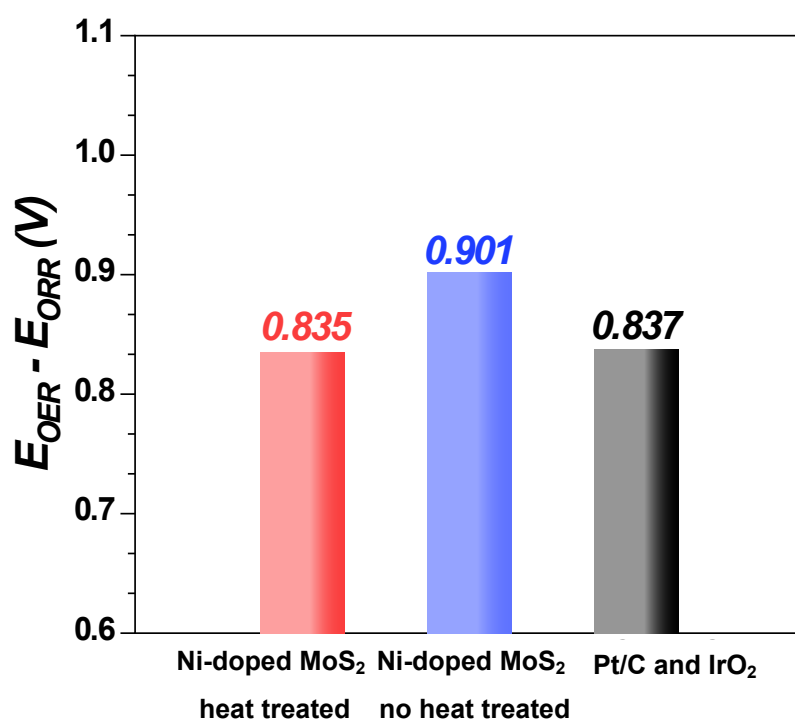

**Figure S9.** The oxygen evolution reaction (OER) and oxygen reduction reaction (ORR) polarization of Ni-doped 1T MoS<sub>2</sub> (before and after heat-treatment), and the commercial Pt/C and IrO<sub>2</sub>.

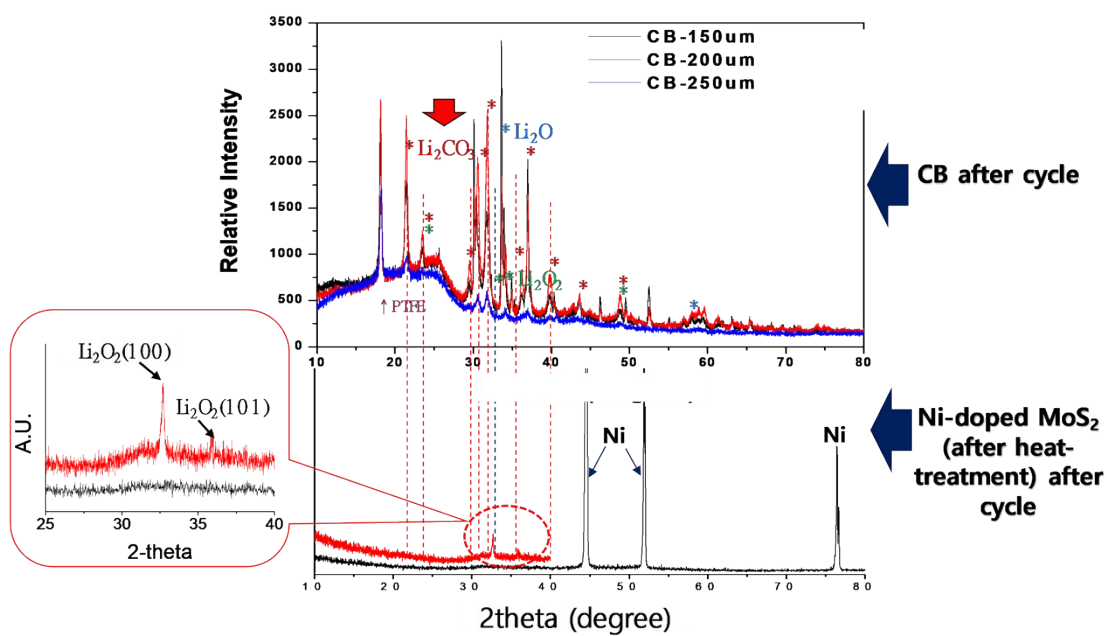

**Figure S10. Ni-doped 1T MoS<sub>2</sub> showed no evidence of Li<sub>2</sub>CO<sub>3</sub> after the cycle test**

## References

1. Kuc, A. 2015. Low-dimensional transition-metal dichalcogenides. Pp. 1–29 in M. Springborg, and J. Joswig, ed. Chemical modelling: Volume 11. The Royal Society of Chemistry, London, UK
